# Supplementary material for: Intra-rater and inter-rater reliability of the fixed plumb line for postural and scoliosis assessment in the sagittal plane: a pilot study
Source: PeerJ. 2024 Nov 13;12:e18121. doi: 10.7717/peerj.18121 (PMC11568813; doi:10.7717/peerj.18121)
Supplement: Supplemental Information 1 [file peerj-12-18121-s001.xlsx]

## Sheet: Foglio1
sex	rater	occipite_fixed	c7_fixed	cifosi_fixed	t12_fixed	l3_fixed	s2_fixed	occipite_normal	c7_normal	cifosi_normal	t12_normal	l3_normal	s2_normal
f	r1	4	7	4	5	7	6	0	3	0	1	5	4
f	r2	6	8	5	6	8	6	0	2.5	0	3	4.5	2.5
f	r3	4	7	4	5	7	6	1	3	0	2	6	4.5
f	r4	2.5	7	4	5	7	6	1	3.5	4	3.5	4.5	5
f	r1	3	5	2	2	5	5	1	3	0	1	5	4
f	r2	4	4.5	1	3	6	5	1	3	0	2	4	5
f	r3	1	4.5	0	2	4	4	3.5	4.5	0	4	5.5	5
f	r4	1	4.5	0	2	4	3	1	3	0	1	6	4
f	r1	0	4	2	4	5.5	4.5	3	3	0	2	5	4
f	r2	0	4	2	4	5.5	4.5	3	2	0	2	4	5
f	r3	0	3.5	1.5	4	6	4.5	3	3	0	3.5	6	5
f	r4	0	5	0	3.5	5.5	4.5	2.5	4.5	0	3	7	5
f	r1	2	4	0	2	6	4	0	2	0	4	7	2
f	r2	3	4	0	2	5	4	3	2.5	0	4	5.5	4.5
f	r3	2	3	0	3	6	4	4	5	0	2	6	6
f	r4	3	5	1	3	6	5	4	6	0	1	5.5	3.5
f	r1	3	3.5	2	4	7	3	0	2	0	4	7	2
f	r2	4	5	2	3	8	4.5	3.5	3.5	0	2	6	4.5
f	r3	5	3.5	2.5	4	6.5	3.5	2	2.5	0	3	6.5	3.5
f	r4	2	4	0	4	7	3	0	2	0	4.5	5	2
f	r1	6	8	5	6	6	5	5	5	0	5.5	5	3
f	r2	6	8	5	6.5	7	5.5	3	5	4	5	5.5	5
f	r3	6	8	5.5	6	6	5.5	5	7	5	6	6	5.5
f	r4	8	8	5.5	6	5.5	5	5	6.5	5	7	6	5.5
f	r1	2	5	0	1	5	3	1	4	1	1.5	5	3
f	r2	4	5	1.5	2	5	3	0	3	0	1	4.5	2
f	r3	4	4.5	1	1.5	5	2.5	0	3	1	1.5	4.5	3.5
f	r4	2	5	0	5	3.5	5	0	5	1	3.5	6	2.5
f	r1	2.5	4.5	0.5	2	6.5	5	1	3	0	2	6	4
f	r2	2.6	4.5	0.5	3	6	6	0	3	0	3	6	4.5
f	r3	3	4.5	0	3	7	5	2.5	2.5	0	2.5	5	5.5
f	r4	3	5	1	4	7	4	2	3.5	0	3	6	3
f	r1	0	3.5	0	1	3.5	3	0	3.5	1	1	4	3.5
f	r2	0	3	1	1	4.5	4.5	0	3	1	1	4.5	4.5
f	r3	0	3.5	0	1.5	3	4	0	4	1	2	3	4.5
f	r4	0	4.5	0	2.5	3	4.5	0	4	1	1.5	2	4.5
f	r1	6	5	2.5	3.5	6	4	2	4	1	2.5	5	4
f	r2	5	4	2	4	6	4	5	4	2	4	6.5	4
f	r3	5	3	2	5	6	4	1.5	2.5	0	2.5	4	2.5
f	r4	5	4	2	4	5	5	1.5	2.5	0	2.5	5	2.5
f	r1	0	3	0	2	6	4.5	1	4	0	1	6	5.5
f	r2	2	4	0	2	6	4.5	2	4	0	2	6	4.5
f	r3	2	4	0	2.5	5.5	6	1	5	0	4	5.5	6
f	r4	1	4.5	0	3.5	5	6	1	5.5	0	2	6	5
f	r1	3.5	5.5	1	4	5	4	3	4.5	0	2	7.5	5
f	r2	3	4	0	1	6	4	3	4	0	1	6	4
f	r3	3	2.5	0	1.5	5.5	7	3	4	0	3	5.5	6
f	r4	3	5	0	2.5	3.5	2	3	3.5	0	4	5	3.5
f	r1	1	4	0	1.5	5	3	2	5	0	3	5	3
f	r2	3	3	0	1	4	3	3	3	0	1	4	3
f	r3	2	3.5	0	2	4	2.5	3	3	0	2	6	3.5
f	r4	2	4	0	2	4	2	2.5	3	0	1.5	4	3.5
f	r1	0	4	1.5	3.5	4	3	0	4	1	2	5	3.5
f	r2	0	3	0	3	3	2	0	3	0	1	3	3
f	r3	0	2.5	1	2.5	3.5	3	0	3.5	0	3	4	3.5
f	r4	0	3	0	3	4	2.5	0	3	0	4	4	3
f	r1	0	3.5	0	2	4.5	2	0	3	0	2.5	5	2.5
f	r2	1	3	0	3	4	2.5	1	3	0	3	6	2.5
f	r3	1	4	0	3.5	4	2.5	1	3	0	1	4	3.5
f	r4	1	3	0	3	4.5	2.5	1	3	0	3.5	3.5	2
f	r1	2	5	1.5	4	7	5	2	4	0	3	5	4
f	r2	3	5	1.5	3	6	4	1	4.5	1	2	5.5	4
f	r3	2	5	0	3.5	5.5	4	3	5.5	0	2.5	4	4.5
f	r4	2	5	1.5	3	4	5	2	5	0	3	5	4
f	r1	3	3.5	2	4	7	6	1	4	1.5	3.5	6	4
f	r2	2.5	4	1.5	4	7	3.5	1	4	2	3.5	6	3
f	r3	0	3.5	2	4	6	5	1.5	5	2	4	5	3.5
f	r4	3	3.5	2	4	7	6	0	6.5	2	3.5	4	3
f	r1	1.5	4.5	1.5	4	5.5	4	1	4	1	3	5.5	4
f	r2	1	3.5	1.5	3	5.5	3.5	2	4	1	2	5.5	4
f	r3	0	3	5	3	5	4	1.5	5	2	4	5	3.5
f	r4	1.5	4.5	2	4	4.5	5	0	4	0	3	6	5
f	r1	0	4	1	3.5	6	4	1	4	2	2	6	5.5
f	r2	0	4	1	3.6	6	4	2	5	2	3.5	6	4
f	r3	0	4	1.5	3	4.5	5	0	4	1.5	3.5	4.5	5
f	r4	0	5	2	4.5	5	3	0	4.5	3.5	6	3	0
f	r1	1	4	0	1.5	5	3	2	5	0	3	5	3
f	r2	3	3	0	1	4	3	3	3	0	1	4	3
f	r3	2	3.5	0	2	4	2.5	3	3	0	2	6	3.5
f	r4	2	4	0	2	4	2	2.5	3	0	1.5	4	3.5
f	r1	0	3.5	0	2	4.5	2	0	3	0	2.5	5	2.5
f	r2	1	3	0	3	4	2.5	1	3	0	3	6	2.5
f	r3	1	4	0	3.5	4	2.5	1	3	0	1	4	3.5
f	r4	1	3	0	3	4.5	2.5	1	3	0	3.5	3.5	2
f	r1	3.5	5.5	1	4	5	4	3	4.5	0	2	7.5	5
f	r2	3	4	0	1	6	4	3	4	0	1	6	4
f	r3	3	2.5	0	1.5	5.5	7	3	4	0	3	5.5	6
f	r4	3	5	0	2.5	3.5	2	3	3.5	0	4	5	3.5
f	r1	3	5	2	2	5	5	1	3	0	1	5	4
f	r2	4	4.5	1	3	6	5	1	3	0	2	4	5
f	r3	1	4.5	0	2	4	4	3.5	4.5	0	4	5.5	5
f	r4	1	4.5	0	2	4	3	1	3	0	1	6	4
f	r1	3	3.5	2	4	7	3	0	2	0	4	7	2
f	r2	4	5	2	3	8	4.5	3.5	3.5	0	2	6	4.5
f	r3	5	3.5	2.5	4	6.5	3.5	2	2.5	0	3	6.5	3.5
f	r4	2	4	0	4	7	3	0	2	0	4.5	5	2
f	r1	2	5	0	1	5	3	1	4	1	1.5	5	3
f	r2	4	5	1.5	2	5	3	0	3	0	1	4.5	2
f	r3	4	4.5	1	1.5	5	2.5	0	3	1	1.5	4.5	3.5
f	r4	2	5	0	5	3.5	5	0	5	1	3.5	6	2.5
f	r1	6	8	5	6	6	5	5	5	0	5.5	5	3
f	r2	6	8	5	6.5	7	5.5	3	5	4	5	5.5	5
f	r3	6	8	5.5	6	6	5.5	5	7	5	6	6	5.5
f	r4	8	8	5.5	6	5.5	5	5	6.5	5	7	6	5.5
f	r1	4	7	4	5	7	6	0	3	0	1	5	4
f	r2	6	8	5	6	8	6	0	2.5	0	3	4.5	2.5
f	r3	4	7	4	5	7	6	1	3	0	2	6	4.5
f	r4	2.5	7	4	5	7	6	1	3.5	4	3.5	4.5	5
f	r1	0	4	1.5	3.5	4	3	0	4	1	2	5	3.5
f	r2	0	3	0	3	3	2	0	3	0	1	3	3
f	r3	0	2.5	1	2.5	3.5	3	0	3.5	0	3	4	3.5
f	r4	0	3	0	3	4	2.5	0	3	0	4	4	3
f	r1	2	5	1.5	4	7	5	2	4	0	3	5	4
f	r2	3	5	1.5	3	6	4	1	4.5	1	2	5.5	4
f	r3	2	5	0	3.5	5.5	4	3	5.5	0	2.5	4	4.5
f	r4	2	5	1.5	3	4	5	2	5	0	3	5	4
f	r1	1.5	4.5	1.5	4	5.5	4	1	4	1	3	5.5	4
f	r2	1	3.5	1.5	3	5.5	3.5	2	4	1	2	5.5	4
f	r3	0	3	5	3	5	4	1.5	5	2	4	5	3.5
f	r4	1.5	4.5	2	4	4.5	5	0	4	0	3	6	5
f	r1	2.5	4.5	0.5	2	6.5	5	1	3	0	2	6	4
f	r2	2.6	4.5	0.5	3	6	6	0	3	0	3	6	4.5
f	r3	3	4.5	0	3	7	5	2.5	2.5	0	2.5	5	5.5
f	r4	3	5	1	4	7	4	2	3.5	0	3	6	3
f	r1	0	3	0	2	6	4.5	1	4	0	1	6	5.5
f	r2	2	4	0	2	6	4.5	2	4	0	2	6	4.5
f	r3	2	4	0	2.5	5.5	6	1	5	0	4	5.5	6
f	r4	1	4.5	0	3.5	5	6	1	5.5	0	2	6	5
f	r1	0	4	2	4	5.5	4.5	3	3	0	2	5	4
f	r2	0	4	2	4	5.5	4.5	3	2	0	2	4	5
f	r3	0	3.5	1.5	4	6	4.5	3	3	0	3.5	6	5
f	r4	0	5	0	3.5	5.5	4.5	2.5	4.5	0	3	7	5
f	r1	6	5	2.5	3.5	6	4	2	4	1	2.5	5	4
f	r2	5	4	2	4	6	4	5	4	2	4	6.5	4
f	r3	5	3	2	5	6	4	1.5	2.5	0	2.5	4	2.5
f	r4	5	4	2	4	5	5	1.5	2.5	0	2.5	5	2.5
f	r1	0	4	1	3.5	6	4	1	4	2	2	6	5.5
f	r2	0	4	1	3.6	6	4	2	5	2	3.5	6	4
f	r3	0	4	1.5	3	4.5	5	0	4	1.5	3.5	4.5	5
f	r4	0	5	2	4.5	5	3	0	4.5	3.5	6	3	0
f	r1	3	3.5	2	4	7	6	1	4	1.5	3.5	6	4
f	r2	2.5	4	1.5	4	7	3.5	1	4	2	3.5	6	3
f	r3	0	3.5	2	4	6	5	1.5	5	2	4	5	3.5
f	r4	3	3.5	2	4	7	6	0	6.5	2	3.5	4	3
f	r1	0	3.5	0	1	3.5	3	0	3.5	1	1	4	3.5
f	r2	0	3	1	1	4.5	4.5	0	3	1	1	4.5	4.5
f	r3	0	3.5	0	1.5	3	4	0	4	1	2	3	4.5
f	r4	0	4.5	0	2.5	3	4.5	0	4	1	1.5	2	4.5
f	r1	2	4	0	2	6	4	0	2	0	4	7	2
f	r2	3	4	0	2	5	4	3	2.5	0	4	5.5	4.5
f	r3	2	3	0	3	6	4	4	5	0	2	6	6
f	r4	3	5	1	3	6	5	4	6	0	1	5.5	3.5
m	r1	3	5	0	3	3.5	2	4	1	0	1	3	2
m	r2	3	5	0	3	3.5	3	4	1	0	3	5	2
m	r3	2	4	0	3	3.5	3	0.5	4	0	2	4	2.5
m	r4	2	4	0	4	3	3	4	1	0	1	3	2
m	r1	9	7	0	4	4.5	3	8	7	3	4.5	3.5	2
m	r2	6.5	7	0	3	4.5	4	5	5.5	0	2.5	4	3
m	r3	3	7	0	4	5	4	4	5.5	0	2	3	1
m	r4	8	7	0	4	3	4	3	5	0	1.5	5	2
m	r1	4	5.5	0	2	5.5	6	2	3.5	0	1	6	5
m	r2	3	6	0	3.5	5	6	1.5	4	0	3	5.5	5
m	r3	4	5.5	0	2	5	6	1.5	4	0	2.5	3	6
m	r4	5	5.5	0	2	5	5	3	4.5	0	4	5	6.5
m	r1	0	4	0	1	5	4	4	4.5	0	2	4	3
m	r2	1	4	0	1	5	4	4	4.6	0	1	5	3
m	r3	2	4.5	0	2	5	5.5	3	5	0	4	5	5.5
m	r4	2	5	0	2	4	5.5	3	4.5	0	2	4	6
m	r1	0	4.5	0	2	4	3.5	1	3	0	2	4	3
m	r2	2	4.5	0	3	4	3.5	0	3	0	3	4.5	4
m	r3	1.5	4.5	0	3	5	3	4.5	4	0	2.5	6	5.5
m	r4	1.5	5	0	2.5	4.5	3.5	2	4.5	0	3	4.5	5
m	r1	3	5.5	3	4	7.5	6.5	1.5	3	0	5	7.5	7
m	r2	3	6	2	4	8	6.5	0	4	1	3	6	5
m	r3	0	4	0	3	6	6.5	2.5	4	0	1.5	5	7
m	r4	0	4.5	0	4.5	5.5	6.5	3	5	0	4.5	7	8.5
m	r1	4	4	1.5	3	5	4.5	0	4	0	2	5	4
m	r2	0	3.5	0.5	4	5.5	4.5	0	3	0	4	6	4.5
m	r3	0	5	2.5	4	5	4.5	2.5	5.5	1.5	2.5	6.5	5
m	r4	4	5	1.5	5	5.5	4	0	3	0	5	5.5	3
m	r1	2	4	0	3	6	5	2	4	0	2	6	4
m	r2	2	4	0	3	6.5	4.5	3	4	0	5	5.5	4
m	r3	4.5	5	0	4	5.5	3.5	3.5	5	0	3	6	5
m	r4	4	5	0	4	5.5	4	2	4.5	0	3	4.5	4
m	r1	2	4	0	2	5.5	4	2	4.5	1	2	5	5.5
m	r2	0	4.5	0	2	6.5	5	0	3	0	3	5.5	4
m	r3	3.5	5.5	1	3	5.5	4	2	4.5	1	4.5	5.5	4
m	r4	2	5	1	2	6	5	2	5	0	4.5	5.5	4
m	r1	8	7.5	0	2.5	5.5	4	5.5	6	0	2	5	3
m	r2	7	8.5	1	4	6	4.5	4	3.5	0	3	5	3.5
m	r3	8	8	0.5	4.5	5	2.5	4.5	6	0	3	5	2.5
m	r4	8	7	0	3	5.5	3.5	4.5	5	0	3	5	2
m	r1	1	4	0	2	4	3	0	3	0	1.5	3	3.5
m	r2	0	3.5	0	1.5	4	3.5	0	3	0	3	3	3.5
m	r3	1	4	0	2	4	3	1	5	0	1.5	5	3
m	r4	0	6	0	1.5	3.5	4	2	7	0	2	4	3
m	r1	1	3	0	2.5	5	4	2	3	0	3	4.5	3
m	r2	1	3	0	2.5	5	5	1	2.5	0	2	4.5	3
m	r3	1	3	0	2.5	5	4	2	3	0	3	4.5	3
m	r4	1	4	0	5	6	2	1	4	0	5	4	2
m	r1	4	4	0	4	6	5	3	5	0	3.5	7	3
m	r2	5	5	0	4	5	3	5	5	0	4.5	6	5
m	r3	4	6	0	5	5	3	5	5	0	3	5	3.5
m	r4	5	5.5	0	6	5.5	3	5	5	0	5.5	5	3
m	r1	3	5	0	3	7	6	2	4	0	2.5	6	5.5
m	r2	3	5	0	3	7	6	2	4.5	0	7.5	7.5	5.5
m	r3	1.5	5.5	0	3	7	6.5	2	5.5	0	4.5	6	7.5
m	r4	2	6	0	3	9	6	2	7	7	8	7	9
m	r1	0	3	1	2	5.5	3	0.5	2.5	0	3	6	3
m	r2	0	3	0	2.5	5.5	3	0	3	0	2.5	5.5	3
m	r3	0	2.5	1	3	5	4	1.5	4	0	4	4.5	3.5
m	r4	0	2.5	0	3	4	5	1.5	4	0	4	4	4
m	r1	4	5	1	2	5	2	2.5	4	0	2	5	3
m	r2	4	5	1	2	5	2	2.5	4.5	0	4	5	3
m	r3	4	4	0	3	5	3	1.5	4	0	2	6	5.5
m	r4	4	3	0	3	4.5	3	1.5	4	0	1	6	5
m	r1	4	3	1	3	3.5	1	4	3.5	0	2	5	2.5
m	r2	4	3.5	0	2	3.5	1	4	3.5	0	4	3.5	1
m	r3	4	3	0	2	3	1	2	4	0	2.5	3	1
m	r4	6	5	1	3	4	1	2	4.5	0	3	2.5	0
m	r1	4	6.5	1	4	5	4	2	6	0	3	5	4
m	r2	3.5	6	0	2.5	4.5	4.5	3.5	6	0	2.5	4	4
m	r3	3	5	0	4	5	4	2	5	0	2	3.5	4
m	r4	3	5	0	4	5	4	1.5	5	0	3	4	3.5
m	r1	2	6	0	2	4.5	3	3	5	0	2.5	3.5	3
m	r2	3	5	0	2	3	3	3	5	0	2	4	3
m	r3	4	5	0	2.5	3	2	2	3	0	4	3	3
m	r4	3	5	0	2.5	3.5	2	1.5	3	0	2.5	2.5	4
m	r1	0	4.5	1	3	7	4	0	4	0	3	6.5	3
m	r2	0	3.5	0	2	3	3	0	3.5	0	2	5	4
m	r3	1	6	0	6	5	3	0	4	1	3	6	6
m	r4	1	6	0	6	5	3	0	4	1	5.5	5.5	5.5
m	r1	2	3	0	2.5	4.5	3	4	4	1	2	4	4
m	r2	4	3	2	2	4	3	4	4.5	2	2	4	3
m	r3	0	3	1	2.5	3.5	3	2	3	0	2	4.5	3.5
m	r4	0	2.5	0	2.5	4	3	2	4	0	4	5	4.5
m	r1	1.5	4.5	0	1.5	4	3.5	3.5	5	0	3	6	4
m	r2	2.5	5	0	1	4	3	4	4.5	0	2	5	2.5
m	r3	2	5	0	4	5	2	1	4	0	1	4	3.5
m	r4	2	5	0	1.5	5	3.5	1	4	0	3	3	3.5
m	r1	1	3.5	0	2	4	4	1	4	0	2.5	5.5	5
m	r2	1.5	4	0	2.5	4.5	3	1.5	3	0	2.5	4	3
m	r3	0	4.5	1	2.5	4.5	4	0	5	1	4	5	3.5
m	r4	0	4	0	2.5	4.5	4	0	3.5	1	4	5.5	4
m	r1	2.5	4	0	3	6	4.5	3	3	0	4	5	5
m	r2	2.5	4	0	3.5	5.5	3.5	3	3.5	0	2.5	6	4
m	r3	3	3.5	0	4.5	5	5	0	3	0	4	6	5
m	r4	2.5	4	0	3	6	5	0	4.5	3.5	6	3	0
m	r1	2	3	0	2.5	6	2.5	1	3.5	0	4	7	4
m	r2	2	3	0	3	6	3	2	3.5	0	2.5	5.5	2
m	r3	0	3	1	3	4	2.5	0	5	0	5	4	1
m	r4	2	3	1	3	6	2.5	0	5	0	5	4	1
m	r1	9	7	0	4	4.5	3	8	7	3	4.5	3.5	2
m	r2	6.5	7	0	3	4.5	4	5	5.5	0	2.5	4	3
m	r3	3	7	0	4	5	4	4	5.5	0	2	3	1
m	r4	8	7	0	4	3	4	3	5	0	1.5	5	2
m	r1	1	3	0	2.5	5	4	2	3	0	3	4.5	3
m	r2	1	3	0	2.5	5	5	1	2.5	0	2	4.5	3
m	r3	1	3	0	2.5	5	4	2	3	0	3	4.5	3
m	r4	1	4	0	5	6	2	1	4	0	5	4	2
m	r1	0	3	1	2	5.5	3	0.5	2.5	0	3	6	3
m	r2	0	3	0	2.5	5.5	3	0	3	0	2.5	5.5	3
m	r3	0	2.5	1	3	5	4	1.5	4	0	4	4.5	3.5
m	r4	0	2.5	0	3	4	5	1.5	4	0	4	4	4
m	r1	4	3	1	3	3.5	1	4	3.5	0	2	5	2.5
m	r2	4	3.5	0	2	3.5	1	4	3.5	0	4	3.5	1
m	r3	4	3	0	2	3	1	2	4	0	2.5	3	1
m	r4	6	5	1	3	4	1	2	4.5	0	3	2.5	0
m	r1	4	6.5	1	4	5	4	2	6	0	3	5	4
m	r2	3.5	6	0	2.5	4.5	4.5	3.5	6	0	2.5	4	4
m	r3	3	5	0	4	5	4	2	5	0	2	3.5	4
m	r4	3	5	0	4	5	4	1.5	5	0	3	4	3.5
m	r1	2.5	4	0	3	6	4.5	3	3	0	4	5	5
m	r2	2.5	4	0	3.5	5.5	3.5	3	3.5	0	2.5	6	4
m	r3	3	3.5	0	4.5	5	5	0	3	0	4	6	5
m	r4	2.5	4	0	3	6	5	0	4.5	3.5	6	3	0
m	r1	2	3	0	2.5	6	2.5	1	3.5	0	4	7	4
m	r2	2	3	0	3	6	3	2	3.5	0	2.5	5.5	2
m	r3	0	3	1	3	4	2.5	0	5	0	5	4	1
m	r4	2	3	1	3	6	2.5	0	5	0	5	4	1
m	r1	3	5	0	3	3.5	2	4	1	0	1	3	2
m	r2	3	5	0	3	3.5	3	4	1	0	3	5	2
m	r3	2	4	0	3	3.5	3	0.5	4	0	2	4	2.5
m	r4	2	4	0	4	3	3	4	1	0	1	3	2
m	r1	0	4.5	0	2	4	3.5	1	3	0	2	4	3
m	r2	2	4.5	0	3	4	3.5	0	3	0	3	4.5	4
m	r3	1.5	4.5	0	3	5	3	4.5	4	0	2.5	6	5.5
m	r4	1.5	5	0	2.5	4.5	3.5	2	4.5	0	3	4.5	5
m	r1	4	4	1.5	3	5	4.5	0	4	0	2	5	4
m	r2	0	3.5	0.5	4	5.5	4.5	0	3	0	4	6	4.5
m	r3	0	5	2.5	4	5	4.5	2.5	5.5	1.5	2.5	6.5	5
m	r4	4	5	1.5	5	5.5	4	0	3	0	5	5.5	3
m	r1	4	4	0	4	6	5	3	5	0	3.5	7	3
m	r2	5	5	0	4	5	3	5	5	0	4.5	6	5
m	r3	4	6	0	5	5	3	5	5	0	3	5	3.5
m	r4	5	5.5	0	6	5.5	3	5	5	0	5.5	5	3
m	r1	4	5	1	2	5	2	2.5	4	0	2	5	3
m	r2	4	5	1	2	5	2	2.5	4.5	0	4	5	3
m	r3	4	4	0	3	5	3	1.5	4	0	2	6	5.5
m	r4	4	3	0	3	4.5	3	1.5	4	0	1	6	5
m	r1	2	6	0	2	4.5	3	3	5	0	2.5	3.5	3
m	r2	3	5	0	2	3	3	3	5	0	2	4	3
m	r3	4	5	0	2.5	3	2	2	3	0	4	3	3
m	r4	3	5	0	2.5	3.5	2	1.5	3	0	2.5	2.5	4
m	r1	3	5.5	3	4	7.5	6.5	1.5	3	0	5	7.5	7
m	r2	3	6	2	4	8	6.5	0	4	1	3	6	5
m	r3	0	4	0	3	6	6.5	2.5	4	0	1.5	5	7
m	r4	0	4.5	0	4.5	5.5	6.5	3	5	0	4.5	7	8.5
m	r1	2	4	0	3	6	5	2	4	0	2	6	4
m	r2	2	4	0	3	6.5	4.5	3	4	0	5	5.5	4
m	r3	4.5	5	0	4	5.5	3.5	3.5	5	0	3	6	5
m	r4	4	5	0	4	5.5	4	2	4.5	0	3	4.5	4
m	r1	1	4	0	2	4	3	0	3	0	1.5	3	3.5
m	r2	0	3.5	0	1.5	4	3.5	0	3	0	3	3	3.5
m	r3	1	4	0	2	4	3	1	5	0	1.5	5	3
m	r4	0	6	0	1.5	3.5	4	2	7	0	2	4	3
m	r1	0	4	0	1	5	4	4	4.5	0	2	4	3
m	r2	1	4	0	1	5	4	4	4.6	0	1	5	3
m	r3	2	4.5	0	2	5	5.5	3	5	0	4	5	5.5
m	r4	2	5	0	2	4	5.5	3	4.5	0	2	4	6
m	r1	8	7.5	0	2.5	5.5	4	5.5	6	0	2	5	3
m	r2	7	8.5	1	4	6	4.5	4	3.5	0	3	5	3.5
m	r3	8	8	0.5	4.5	5	2.5	4.5	6	0	3	5	2.5
m	r4	8	7	0	3	5.5	3.5	4.5	5	0	3	5	2
m	r1	4	5.5	0	2	5.5	6	2	3.5	0	1	6	5
m	r2	3	6	0	3.5	5	6	1.5	4	0	3	5.5	5
m	r3	4	5.5	0	2	5	6	1.5	4	0	2.5	3	6
m	r4	5	5.5	0	2	5	5	3	4.5	0	4	5	6.5
m	r1	2	4	0	2	5.5	4	2	4.5	1	2	5	5.5
m	r2	0	4.5	0	2	6.5	5	0	3	0	3	5.5	4
m	r3	3.5	5.5	1	3	5.5	4	2	4.5	1	4.5	5.5	4
m	r4	2	5	1	2	6	5	2	5	0	4.5	5.5	4
m	r1	0	4.5	1	3	7	4	0	4	0	3	6.5	3
m	r2	0	3.5	0	2	3	3	0	3.5	0	2	5	4
m	r3	1	6	0	6	5	3	0	4	1	3	6	6
m	r4	1	6	0	6	5	3	0	4	1	5.5	5.5	5.5
m	r1	1	3.5	0	2	4	4	1	4	0	2.5	5.5	5
m	r2	1.5	4	0	2.5	4.5	3	1.5	3	0	2.5	4	3
m	r3	0	4.5	1	2.5	4.5	4	0	5	1	4	5	3.5
m	r4	0	4	0	2.5	4.5	4	0	3.5	1	4	5.5	4
m	r1	2	3	0	2.5	4.5	3	4	4	1	2	4	4
m	r2	4	3	2	2	4	3	4	4.5	2	2	4	3
m	r3	0	3	1	2.5	3.5	3	2	3	0	2	4.5	3.5
m	r4	0	2.5	0	2.5	4	3	2	4	0	4	5	4.5
m	r1	1.5	4.5	0	1.5	4	3.5	3.5	5	0	3	6	4
m	r2	2.5	5	0	1	4	3	4	4.5	0	2	5	2.5
m	r3	2	5	0	4	5	2	1	4	0	1	4	3.5
m	r4	2	5	0	1.5	5	3.5	1	4	0	3	3	3.5
m	r1	3	5	0	3	7	6	2	4	0	2.5	6	5.5
m	r2	3	5	0	3	7	6	2	4.5	0	7.5	7.5	5.5
m	r3	1.5	5.5	0	3	7	6.5	2	5.5	0	4.5	6	7.5
m	r4	2	6	0	3	9	6	2	7	7	8	7	9
